# Supplementary material
Source: Springer Nature journal article supplement (https://www.springermedizin.de/resource/supplementary/12889_2013_6349_MOESM1_ESM.pdf/9497612)
Supplement: MOESM1 [file 9497612]

**Table S1. Regression results**

| <b>Attribute</b>   | <b>Levels</b>                     | <b>Hierarchical Bayes coefficient estimate (95% Confidence Interval)</b> |
|--------------------|-----------------------------------|--------------------------------------------------------------------------|
| Number of sessions | 1 session                         | 0.54 (0.37 to 0.71)                                                      |
|                    | 2 sessions                        | 0.03 (-0.09 to 0.14)                                                     |
|                    | 3 sessions                        | -0.57 (-0.74 to -0.4)                                                    |
| Travel time        | 15 minutes                        | 0.65 (0.48 to 0.81)                                                      |
|                    | 25 minutes                        | 0.05 (-0.11 to 0.21)                                                     |
|                    | 30 minutes                        | -0.49 (-0.64 to -0.34)                                                   |
|                    | 45 minutes                        | -0.21 (-0.38 to -0.04)                                                   |
| Travel cost        | None                              | 0.01 (-0.11 to 0.14)                                                     |
|                    | S\$2                              | 0.06 (-0.06 to 0.18)                                                     |
|                    | S\$5                              | -0.07 (-0.17 to 0.04)                                                    |
| Incentive type     | Cash payment                      | 0.91 (0.75 to 1.07)                                                      |
|                    | Supermarket voucher               | 0.66 (0.53 to 0.81)                                                      |
|                    | Credit into your Medisave account | -0.32 (-0.48 to -0.16)                                                   |
|                    | Sporting goods voucher            | -1.25 (-1.46 to -1.06)                                                   |
| Enrollment fee     | None                              | 0.39 (0.25 to 0.53)                                                      |
|                    | S\$20                             | -0.23 (-0.35 to -0.1)                                                    |
|                    | S\$50                             | -0.16 (-0.29 to -0.03)                                                   |
| Incentive payment  | (Linear)                          | 6.14 (5.41 to 6.95)                                                      |
| Not joining        | (Linear)                          | 2.24 (1.68 to 2.81)                                                      |
